# Supplementary material for: Differential interleukin-1β induction by uropathogenic Escherichia coli correlates with its phylotype and serum C-reactive protein levels in Korean infants
Source: PubMed Central journal article supplement (PMC6821743; doi:10.1038/s41598-019-52070-3), 2019-10-30
Supplement: 41598_2019_52070_MOESM1_ESM.pdf [file 41598_2019_52070_MOESM1_ESM.pdf]

**Differential interleukin-1 $\beta$  induction by uropathogenic Escherichia coli correlates with its phylotype and serum C-reactive protein levels in Korean infants.**

Jong-Hyeok Jung<sup>1,2\*</sup>, Hyun Jung Hong<sup>3,4\*</sup>, Aziz Ghaderpour<sup>1,2\*</sup>, Jae Young Cho<sup>3,4\*</sup>, Bum-Seo Bae<sup>1,2\*</sup>, Yong Hur<sup>5</sup>, Byoung Choul Kim<sup>6</sup>, Donghyun Kim<sup>1,2\*</sup>, Seung-Yong Seong<sup>1,2,5,7\*</sup>, Jae-Young Lim<sup>3,4\*</sup> and Sang-Uk Seo<sup>1,2,8\*</sup>

<sup>1</sup>Department of Biomedical Science, Seoul National University College of Medicine, Seoul, Republic of Korea.

<sup>2</sup>Wide River Institute of Immunology, Seoul National University College of Medicine, Hongcheon, Gangwon-do, Republic of Korea.

<sup>3</sup>Department of Pediatrics, Gyeongsang National University School of Medicine, Jinju, Gyeongsangnam-do, Republic of Korea.

<sup>4</sup>Gyeongsang Institute of Health Science, Jinju, Gyeongsangnam-do, Republic of Korea.

<sup>5</sup>Department of Medicine, Seoul National University College of Medicine, Seoul, Republic of Korea

<sup>6</sup>Division of Nano-bioengineering, Incheon National University, Incheon, Republic of Korea.

<sup>7</sup>Department of Microbiology and Immunology, Institute of Infectious Diseases, Seoul National University College of Medicine, Seoul, Republic of Korea.

<sup>8</sup>Mucosal Immunology Laboratory, University of Ulsan College of Medicine, Seoul, Republic of Korea.

\*Corresponding authors: Dr. Sang-Uk Seo (suseo@ulsan.ac.kr), Dr. Jae-Young Lim (pedneu@gnu.ac.kr)

**Supplementary Table 1**

| Strains | phoA | phylotype | Pathotyping |         |      |      |      |     |     |                       | CRP (mg/L) | WBC/mm <sup>3</sup> | DMSA                                                                                                     | VUR                  | Sonography                                                                                                       | Disease Diagnosis       | Cell viability (Average) | IL-1 $\beta$ (pg/ml)   |                        |          |          | Relative IL-1 $\beta$ (Fold of <i>P. mirabilis</i> group) |                        |         |          | TNF- $\alpha$ (pg/ml)  |                        |          |             | Relative TNF- $\alpha$ (Fold of <i>P. mirabilis</i> group) |                        |             |             |          |
|---------|------|-----------|-------------|---------|------|------|------|-----|-----|-----------------------|------------|---------------------|----------------------------------------------------------------------------------------------------------|----------------------|------------------------------------------------------------------------------------------------------------------|-------------------------|--------------------------|------------------------|------------------------|----------|----------|-----------------------------------------------------------|------------------------|---------|----------|------------------------|------------------------|----------|-------------|------------------------------------------------------------|------------------------|-------------|-------------|----------|
|         |      |           | papC        | sfa/foc | afaC | fimH | iucC | cnf | hly | No. of virulence gene |            |                     |                                                                                                          |                      |                                                                                                                  |                         |                          | Experiment 1 (Average) | Experiment 2 (Average) | Average  | SD       | Experiment 1 (Average)                                    | Experiment 2 (Average) | Average | SD       | Experiment 1 (Average) | Experiment 2 (Average) | Average  | SD          | Experiment 1 (Average)                                     | Experiment 2 (Average) | Average     | SD          |          |
| EC1082  | P    | D         | N           | N       | N    | P    | P    | N   | N   | 2                     | 38.8       | 24030               | No cortical defect in both kidneys.                                                                      | -                    | No remarkable findings.                                                                                          | Acute pyelonephritis    | 111.9517                 | 329.298                | 119.8291               | 224.5636 | 148.1169 | 0.8378870771                                              | 0.206289155            | 0.522   | 0.446607 | 6102.919               | 7454.452               | 6778.686 | 955.6781    | 0.918750821                                                | 0.918750821            | 0.918750821 | 0.918750821 | 0.000207 |
| EC1280  | P    | B2        | P           | N       | N    | N    | N    | N   | N   | 1                     | 133.1      | 21490               | No cortical defect in right kidney. Multiple cortical defects on left kidney. - REC) F/U scan.           | -                    | R/O Urachal remnant at bladder dome.                                                                             | Acute pyelonephritis    | 113.6                    | 1069.520733            | 903.2623333            | 986.3915 | 117.5624 | 1.613638428                                               | 1.901240675            | 1.757   | 0.203365 | 6934.4264              | 7382.066533            | 7158.246 | 316.5294    | 0.959680614                                                | 1.012998762            | 0.98634     | 0.037702    |          |
| EC129   | P    | D         | P           | N       | N    | N    | P    | P   | N   | 3                     | 5.8        | 6680                | No cortical defect in both kidneys.                                                                      | -                    | No remarkable findings.                                                                                          | Urinary tract infection | 115.8545                 | 139.4876667            | 423.8743333            | 281.681  | 201.0917 | 0.210451889                                               | 0.892196092            | 0.551   | 0.482066 | 5654.922667            | 6362.41                | 6008.666 | 500.2691    | 0.782605416                                                | 0.873077129            | 0.827841    | 0.063973    |          |
| EC134   | P    | B2        | P           | N       | N    | N    | P    | N   | N   | 2                     | 36.4       | 10800               | No cortical defect in both kidneys.                                                                      | -                    | No remarkable findings.                                                                                          | Acute pyelonephritis    | 114.876                  | 385.046                | 103.1395               | 244.0928 | 199.338  | 0.979735885                                               | 0.177557541            | 0.579   | 0.567226 | 5693.0115              | 7484.878               | 6588.945 | 1267.041    | 0.857314821                                                | 0.922500783            | 0.889908    | 0.046093    |          |
| EC153   | P    | D         | N           | N       | N    | N    | P    | P   | N   | 2                     | 1.5        | 11210               | No cortical defect in both kidneys.                                                                      | -                    | No remarkable findings.                                                                                          | Acute pyelonephritis    | 100.1455                 | 766.5143333            | 485.3343333            | 625.9243 | 198.8243 | 1.156477799                                               | 1.021560782            | 1.089   | 0.095401 | 5410.436933            | 7079.404133            | 6244.921 | 1180.138    | 0.748770142                                                | 0.971466132            | 0.860118    | 0.15747     |          |
| EC168   | P    | B2        | P           | N       | N    | N    | P    | P   | N   | 3                     | 12.1       | 23650               | No cortical defect in both kidneys.                                                                      | -                    | Bladder wall thickening, R/O Cystitis                                                                            | Acute pyelonephritis    | 97.96567                 | 969.4045               | 41.5966                | 505.5006 | 656.0593 | 2.466615353                                               | 0.071609713            | 1.269   | 1.693525 | 5328.8105              | 6140.847               | 1148.393 | 0.802469523 | 0.85693264                                                 | 0.829701               | 0.038512    |             |          |
| EC172   | P    | B2        | N           | N       | P    | P    | P    | N   | N   | 3                     | 60.8       | 25090               | No cortical defect in right kidney. Suspicious cortical defect on left kidney upper portion. - REC) F/U. | -                    | Bladder wall thickening, R/O Cystitis.                                                                           | Acute pyelonephritis    | 100.9455                 | 471.6423333            | 980.0873333            | 725.8648 | 359.5249 | 0.711589939                                               | 2.062946537            | 1.387   | 0.955553 | 1439.8864              | 6826.030267            | 4132.958 | 3808.579    | 0.199271142                                                | 0.936697086            | 0.567984    | 0.521349    |          |
| EC1759  | P    | B2        | N           | N       | P    | P    | P    | N   | N   | 3                     | 14.1       | 12990               | Unremarkable renal scan                                                                                  | -                    | Bladder wall thickening, R/O Cystitis.                                                                           | Urinary tract infection | 106.2396                 | 2388.768933            | 337.438                | 1363.103 | 1450.51  | 0.201                                                     | 0.796                  | 0.498   | 0.421018 | 8637.9436              | 7687.745767            | 8162.845 | 671.8913    | 0.925                                                      | 0.906                  | 0.915262    | 0.013117    |          |
| EC1768  | P    | B2        | P           | N       | N    | N    | P    | P   | N   | 4                     | 42.7       | 15590               | Unremarkable renal scan                                                                                  | -                    | No remarkable findings.                                                                                          | Urinary tract infection | 2.412646                 | 6214.329617            | 3940.0588              | 5077.194 | 1608.152 | 2.342                                                     | 2.071                  | 2.206   | 0.191739 | 8112.7959              | 5354.9495              | 6733.873 | 1950.092    | 0.644                                                      | 0.851                  | 0.747449    | 0.14631     |          |
| EC211   | P    | D         | N           | N       | N    | N    | P    | P   | N   | 2                     | 0.9        | 18810               | No cortical defect in both kidneys.                                                                      | -                    | Gall bladder stones.                                                                                             | Acute pyelonephritis    | 98.09282                 | 591.61225              | 467.5291               | 529.5707 | 87.74004 | 1.505336378                                               | 0.804864453            | 1.155   | 0.495308 | 6006.4275              | 7280.194               | 6643.311 | 900.6889    | 0.904512369                                                | 0.897273765            | 0.900893    | 0.005118    |          |
| EC220   | P    | D         | N           | N       | N    | N    | P    | P   | N   | 2                     | 29.4       | 15240               | No cortical defect in both kidneys.                                                                      | -                    | No remarkable findings.                                                                                          | Acute pyelonephritis    | 106.1818                 | 87.9698                | 225.1536667            | 156.5617 | 97.00364 | 0.132724355                                               | 0.473916927            | 0.303   | 0.24126  | 5852.555733            | 6230.7172              | 6041.636 | 267.4005    | 0.809956578                                                | 0.855005679            | 0.832481    | 0.031855    |          |
| EC2689  | P    | B2        | P           | P       | N    | N    | P    | P   | N   | 5                     | 42.9       | 10240               | Hydronephrosis/reflux of Left kidney                                                                     | -                    | No remarkable findings.                                                                                          | Urinary tract infection | 6.738769                 | 4732.822567            | 4711.8592              | 4722.341 | 14.82334 | 2.801                                                     | 1.577                  | 2.189   | 0.865186 | 4867.4026              | 5516.436583            | 5191.92  | 458.9363    | 0.663                                                      | 0.511                  | 0.586964    | 0.108115    |          |
| EC291   | P    | D         | P           | N       | N    | N    | P    | N   | N   | 2                     | 41.3       | 10850               | Unremarkable renal scan                                                                                  | -                    | Mild left hydronephrosis.                                                                                        | Urinary tract infection | 95.34109                 | 1053.1174              | 435.7396               | 744.4285 | 436.552  | 0.259                                                     | 0.351                  | 0.305   | 0.064999 | 8344.6793              | 7873.225217            | 8108.952 | 333.3684    | 0.947                                                      | 0.875                  | 0.911035    | 0.05064     |          |
| EC314   | P    | B2        | N           | N       | N    | P    | N    | P   | N   | 4                     | 51.7       | 10460               | Unremarkable renal scan                                                                                  | -                    | Bladder wall thickening, R/O Cystitis.                                                                           | Urinary tract infection | 88.17218                 | 628.5705               | 699.4991667            | 664.0348 | 50.15414 | 0.598                                                     | 0.155                  | 0.377   | 0.313835 | 14925.84533            | 10962.65683            | 12944.25 | 2802.397    | 1.036                                                      | 0.786                  | 0.910703    | 0.176671    |          |
| EC378   | P    | B2        | P           | N       | N    | N    | P    | N   | N   | 2                     | 36.4       | 14790               | No cortical defect in both kidneys.                                                                      | -                    | Bladder wall thickening, R/O Cystitis.                                                                           | Acute pyelonephritis    | 96.58182                 | 41.197                 | 133.988                | 87.5925  | 65.61315 | 0.062155936                                               | 0.28202597             | 0.172   | 0.155472 | 4972.577467            | 6121.358267            | 5546.968 | 812.3107    | 0.68817317                                                 | 0.839998978            | 0.74086     | 0.107357    |          |
| EC388   | P    | B2        | P           | N       | N    | N    | P    | N   | N   | 2                     | 36.7       | 16770               | No cortical defect in right kidney. Possible multiple cortical defects on left kidney. - REC) F/U.       | VUR, right, grade 3. | Prominent left renal pelvis.                                                                                     | Acute pyelonephritis    | 98.03636                 | 0                      | 130.915                | 65.4575  | 92.57088 | 0                                                         | 0.275557735            | 0.138   | 0.194849 | 5470.919467            | 6427.871333            | 5949.395 | 676.6672    | 0.757140541                                                | 0.882060013            | 0.8196      | 0.088331    |          |
| EC393   | P    | B2        | P           | N       | N    | P    | P    | P   | P   | 5                     | 37.7       | 13830               | No cortical defect in both kidneys.                                                                      | -                    | No remarkable findings.                                                                                          | Acute pyelonephritis    | 25.74545                 | 4793.042333            | 2737.843333            | 3765.443 | 1453.245 | 7.231498235                                               | 5.762776675            | 6.497   | 0.138543 | 1765.299467            | 808.2084               | 1286.754 | 676.7656    | 0.244306245                                                | 0.119095815            | 0.177606    | 0.094328    |          |
| EC395   | P    | D         | P           | N       | N    | P    | P    | N   | N   | 3                     | 8          | 8920                | No cortical defect in both kidneys.                                                                      | -                    | 1. Heterogeneous echogenicity in both kidneys; R/O APN.<br>2. Mild wall thickening in the bladder; R/O Cystitis. | Urinary tract infection | 118.9091                 | 50.00926667            | 267.1513333            | 158.5803 | 153.5426 | 0.075451435                                               | 0.562316132            | 0.319   | 0.344265 | 5548.439333            | 5970.412133            | 5759.426 | 298.3798    | 0.767868798                                                | 0.819285504            | 0.793577    | 0.036357    |          |
| EC428   | P    | D         | P           | N       | N    | N    | P    | P   | N   | 3                     | 60.1       | 19570               | No cortical defect in right kidney. Multiple cortical defects on left kidney. - REC) F/U.                | -                    | No remarkable findings.                                                                                          | Acute pyelonephritis    | 95.04132                 | 93.3645                | 119.8291               | 106.5968 | 18.7133  | 0.237562657                                               | 0.206289155            | 0.222   | 0.022114 | 5587.0885              | 7542.402               | 6564.565 | 1382.361    | 0.841363798                                                | 0.929546167            | 0.885455    | 0.062354    |          |
| EC4500  | P    | B2        | P           | N       | N    | N    | N    | N   | N   | 1                     | 19.8       | 10910               | No cortical defect in both kidneys.                                                                      | -                    | No remarkable findings.                                                                                          | Acute pyelonephritis    | 136.5225                 | 509.6760333            | 540.019                | 524.8475 | 21.45572 | 0.321                                                     | 0.170                  | 0.245   | 0.106873 | 8121.5646              | 6474.285683            | 7297.925 | 1164.802    | 0.779                                                      | 0.852                  | 0.815215    | 0.051775    |          |
| EC53    | P    | B2        | P           | N       | N    | N    | N    | N   | N   | 1                     | 19.4       | 17230               | No cortical defect in both kidneys.                                                                      | -                    | Transient small bowel intussusception at LLQ.                                                                    | Acute pyelonephritis    | 107.883                  | 552.78775              | 171.2887               | 362.0382 | 269.7606 | 1.406548816                                               | 0.294878299            | 0.851   | 0.78607  | 5637.148               | 7558.638               | 6597.893 | 1358.699    | 0.848902295                                                | 0.9315916              | 0.890247    | 0.05847     |          |
| EC563   | P    | D         | P           | N       | N    | N    | P    | N   | N   | 2                     | 116.1      | 10810               | No cortical defect in both kidneys.                                                                      | -                    | No remarkable findings.                                                                                          | Acute pyelonephritis    | 118.9447                 | 276.03875              | 127.4785               | 201.7586 | 105.948  | 0.702370805                                               | 0.219457812            | 0.461   | 0.341471 | 4724.469               | 6785.08                | 5754.775 | 1457.072    | 0.711461288                                                | 0.836251655            | 0.773856    | 0.08824     |          |
| EC59    | P    | B2        | N           | N       | N    | N    | P    | N   | N   | 1                     | 26.2       | 14800               | No cortical defect in both kidneys.                                                                      | -                    | No remarkable findings.                                                                                          | Acute pyelonephritis    | 107.1837                 | 211.33125              | 198.757                | 205.0441 | 8.891337 | 0.537724867                                               | 0.342165748            | 0.440   | 0.138281 | 5580.559               | 7518.07                | 6549.315 | 1370.027    | 0.840380516                                                | 0.926591651            | 0.883486    | 0.06096     |          |
| EC604   | P    | B2        | P           | N       | N    | N    | P    | N   | N   | 2                     | 54.1       | 16530               | No cortical defect in right kidney. Cortical defects on left kidney. - REC) F/U.                         | VUR, left, grade 1.  | Slightly prominent both renal pelvis.                                                                            | Acute pyelonephritis    | 118.6268                 | 372.60225              | 42.9874                | 207.7948 | 233.0729 | 0.948073204                                               | 0.074004014            | 0.511   | 0.61806  | 5883.58                | 7491.332               | 6587.456 | 1278.274    | 0.855894524                                                | 0.92329623             | 0.889595    | 0.04766     |          |
| EC640   | P    | B2        | P           | P       | N    | N    | P    | P   | P   | 5                     | 99.7       | 15620               | No cortical defect in both kidneys.                                                                      | -                    | Bladder wall thickening, R/O Cystitis.                                                                           | Urinary tract infection | 19.70909                 | 3050.925               | 1632.587667            | 2341.756 | 1002.916 | 4.603080302                                               | 3.436368331            | 4.020   | 0.82499  | 3342.956533            | 3720.082533            | 3531.52  | 266.668     | 0.462643973                                                | 0.510485646            | 0.486565    | 0.033829    |          |
| EC663   | P    | B2        | P           | N       | N    | N    | P    | P   | N   | 3                     | 7.1        | 12240               | No cortical defect in both kidneys.                                                                      | -                    | Swelling of Left kidney. Conclusion: R/O APN, left kidney.                                                       | Urinary tract infection | 107.3455                 | 0                      | 193.9115               | 96.95575 | 137.1161 | 0                                                         | 0.408156543            | 0.204   | 0.28861  | 5792.925067            | 5958.860133            | 5875.893 | 117.3338    | 0.801704072                                                | 0.817700289            | 0.809702    | 0.011311    |          |
| EC667   | P    | B2        | N           | N       | N    | P    | N    | N   | N   | 1                     | 13         | 9860                | No cortical defect in both kidneys.                                                                      | -                    | Normal kidney and bladder.                                                                                       | Acute pyelonephritis    | 111.8881                 | 1141.626               | 472.3969               | 807.0115 | 473.1264 | 1.904826849                                               | 0.813244507            | 1.359   | 0.771865 | 5521.7935              | 7708.002               | 6614.898 | 1545.883    | 0.831530975                                                | 0.950000505            | 0.890766    | 0.083771    |          |
| EC668   | P    | D         | P           | N       | N    | N    | P    | P   | N   | 3                     | 4.2        | 24580               | Unremarkable renal scan                                                                                  | -                    | Slightly prominent left renal pelvis.                                                                            | Urinary tract infection | 110.2683                 | 70.8884                | 0                      | 35.4442  | 50.12567 | 0.039                                                     | 0.000                  | 0.020   | 0.027577 | 6301.3208              | 6210.519333            | 6255.92  | 64.20633    | 0.795                                                      | 0.679                  | 0.736927    | 0.082127    |          |
| EC68    | P    | B2        | P           | N       | N    | N    | N    | N   | N   | 1                     | 100.7      | 22360               | Suspicious cortical defects on both kidneys. - REC) F/U DMSA scan.                                       | -                    | No remarkable findings.                                                                                          | Acute pyelonephritis    |                          |                        |                        |          |          |                                                           |                        |         |          |                        |                        |          |             |                                                            |                        |             |             |          |
